# Supplementary material
Source: PubMed Central journal article supplement (PMC7115805)
Supplement: mmc1.pdf [file mmc1.pdf]

Pippa McKelvie-Sebileau  
pippamckelvie@hotmail.com

## Facture de relecture d'article

Pippa McKelvie-Sebileau

pippamckelvie@hotmail.com

Siret No.: 50780415100011

Client:

**Institut Bergonié**  
229 cours de l'Argonne  
33076 Bordeaux

TVA: FR 407 81831714

Invoice Number: 201921

DATE: 21/10/2019

| Référence            | DESCRIPTION                                                                                                     | Unités | Prix par unité | Prix total      |
|----------------------|-----------------------------------------------------------------------------------------------------------------|--------|----------------|-----------------|
| Evrard/Khatib        | Relecture de l'article "Proprotein convertases key players in inflammation-related malignancies and metastasis" | 7161   | 0.06           | EUR 429.66      |
| <b>Montant total</b> |                                                                                                                 |        |                | <b>429.66 €</b> |

TVA non applicable, article 293 B du CGI

[Veuillez svp régler dans les 30 jours suivant la date de cette facture aux coordonnées bancaires ci-dessous:](#)

BANK ACCOUNT HOLDER's NAME: Pippa McKelvie-Sebileau  
BANK NAME: BNP Paribas  
BANK's BRANCH: Merignac, France  
IBAN (International Bank Account Number): FR76 3000 4020 5500 0004 2650 684  
BIC: BNPA FR PP XXX

18a Chester st  
Taradale  
4112 Napier  
New Zealand

23 October 2019

TO WHOM IT MAY CONCERN

I hereby certify that I am a native English-speaking Medical Writer and, at the authors' request, I have edited the article entitled: "Proprotein convertases: Key players in inflammation-related malignancies and metastasis" submitted for consideration for publication by Geraldine Siegfried, Serge Evrard and Abdel-Majid Khatib.

Signed



Date

24/10/2019.
